# Supplementary material
Source: MDPI journal article supplement (https://www.mdpi.com/2073-4395/13/2/310)
Supplement: s1 [file s1 › Figure S1.pdf]

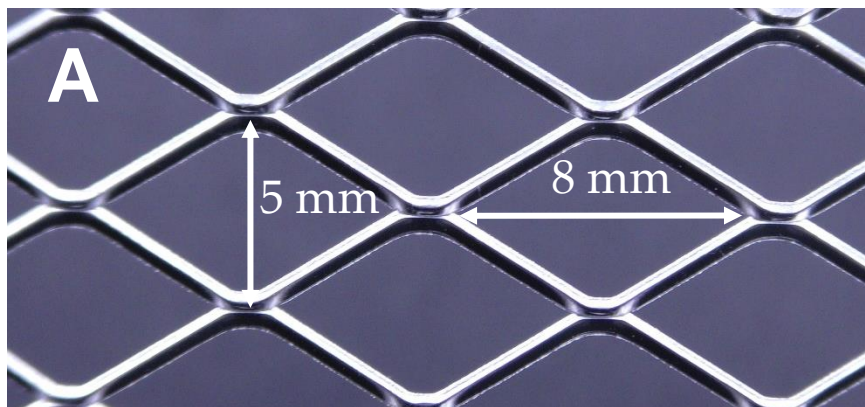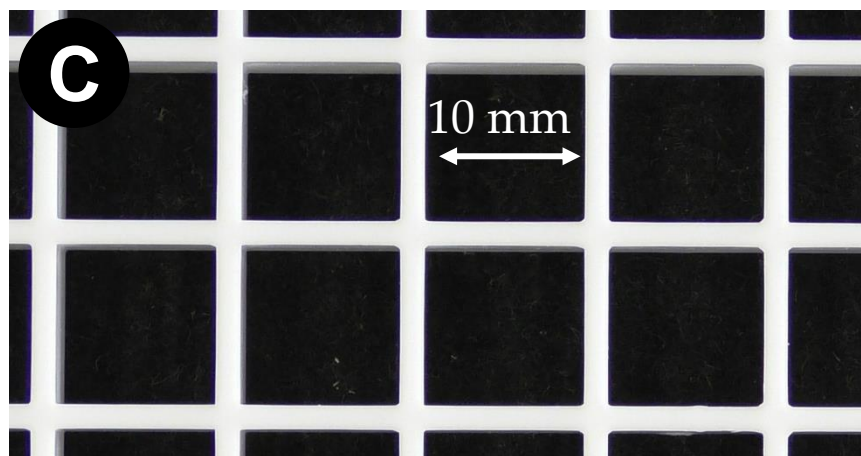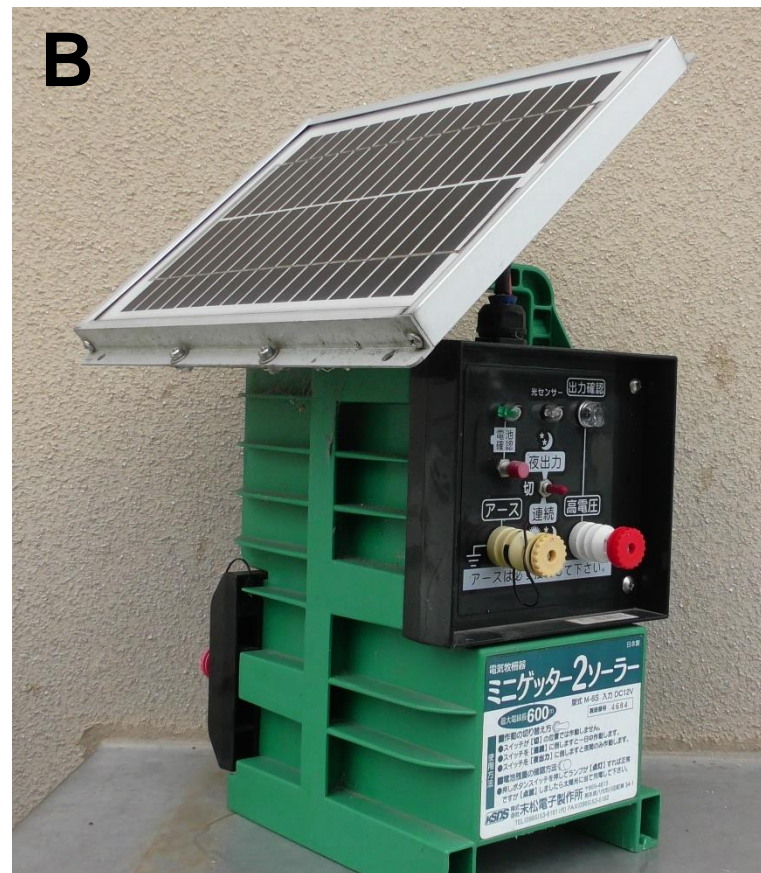

**Figure S1.** (A) An expanded steel net with diamond-shaped meshes. (B) A pulse-type voltage generator operated by a solar panel. (C) A fiberglass reinforced plastic (FRP) grating with square cells (each cell, 10 mm square; depth, 54 mm).
